# Supplementary material for: Historical snowfall measurements in the Central and Southern Apennine Mountains: climatology, variability and trend
Source: Copernicus journal article supplement (doi:10.5194/egusphere-2024-1056), 2024-06-05
Supplement: Supplementary file 1 [file egusphere-2024-1056-supplement.pdf]

## Supplementary material

**Table 1.** List of the nivometric stations rescued in this study. For each station, the membership National Hydrographic and Mareographic Service (NHMS ) compartment, the latitude and the longitude (in decimal degrees), the altitude (in m a.s.l.) and the data availability (in %) for each snow indicator are reported. Note that data availability for Snow Cover Duration (SCD) and Number of Days with Snow (NDS) refers to the 1951-2001 period, whereas data availability for Height of New Snow (HN) is calculated over 1971-2001 period. The stations taken into account for the analysis are marked with an asterisk (\*).

| Station Name              | NHMS<br>Compartment | Latitude<br>(° N) | Longitude<br>(° E) | Altitude<br>a.s.l. (m) | Data Availability (%) |       |      |
|---------------------------|---------------------|-------------------|--------------------|------------------------|-----------------------|-------|------|
|                           |                     |                   |                    |                        | SCD                   | NDS   | HN   |
| Abeto                     | Rome                | 42.837000         | 13.063000          | 898                    | 93.9                  | 93.9  | 90.0 |
| Acerno                    | Naples              | 40.733333         | 15.052778          | 720                    | 2.0                   | 2.0   | 3.2  |
| Agerola (Pianillo)        | Naples              | 40.633333         | 14.552778          | 615                    | 47.1                  | 47.1  | 61.0 |
| Agerola (S. Lazzaro)      | Naples              | 40.633333         | 14.569444          | 583                    | 2.0                   | 2.0   | 3.2  |
| Agnone *                  | Pescara             | 41.800000         | 14.369444          | 806                    | 100.0                 | 100.0 | 96.4 |
| Alatri                    | Naples              | 41.733333         | 13.352778          | 502                    | 7.8                   | 7.8   | 0.0  |
| Alberona*                 | Bari                | 41.433333         | 15.136111          | 700                    | 71.3                  | 72.8  | 85.1 |
| Alfedena                  | Pescara             | 41.733333         | 14.036111          | 880                    | 37.3                  | 37.3  | 9.6  |
| Alfedena (Mont. Spaccata) | Naples              | 41.730507         | 14.179196          | 920                    | 17.6                  | 17.6  | 28.9 |
| Andretta                  | Bari                | 40.933333         | 15.319444          | 890                    | 59.3                  | 65.0  | 65.1 |
| Ariano Irpino             | Naples              | 41.150000         | 15.086111          | 794                    | 35.3                  | 35.3  | 22.5 |
| Arpino                    | Naples              | 41.647042         | 13.613613          | 500                    | 11.8                  | 11.8  | 0.0  |
| Assergi                   | Pescara             | 42.400000         | 13.630000          | 1040                   | 76.5                  | 76.5  | 70.7 |
| Ateleta *                 | Pescara             | 41.850000         | 14.202778          | 735                    | 86.3                  | 86.3  | 86.7 |
| Atella *                  | Bari                | 40.868060         | 15.618060          | 500                    | 75.7                  | 82.4  | 78.3 |
| Atina                     | Naples              | 41.616667         | 13.802778          | 520                    | 5.1                   | 5.1   | 0.0  |
| Avezzano                  | Naples              | 42.033333         | 13.436111          | 697                    | 68.6                  | 68.6  | 61.0 |
| Avezzano (Ente Fucino)    | Naples              | 41.992238         | 13.557241          | 698                    | 9.8                   | 9.8   | 16.1 |
| Avigliano *               | Naples              | 40.730415         | 15.718457          | 910                    | 90.2                  | 90.0  | 90.0 |
| Bagnara*                  | Rome                | 43.116667         | 12.852778          | 620                    | 83.8                  | 83.8  | 78.7 |
| Bagnoli del Trigno        | Pescara             | 41.700000         | 14.452778          | 681                    | 64.2                  | 64.2  | 50.6 |
| Baranello *               | Pescara             | 41.523333         | 14.552778          | 600                    | 96.1                  | 96.1  | 90.0 |
| Barisciano (Cant. Anas) * | Pescara             | 42.316667         | 13.586111          | 810                    | 94.1                  | 94.1  | 93.2 |
| Barrea *                  | Pescara             | 41.750000         | 13.986111          | 1000                   | 88.2                  | 88.2  | 93.2 |
| Bazzano                   | Pescara             | 42.333333         | 13.452778          | 594                    | 66.7                  | 66.7  | 45.0 |
| Beffi *                   | Pescara             | 42.200000         | 13.686111          | 640                    | 96.1                  | 96.1  | 93.2 |
| Bellosguardo              | Naples              | 40.416667         | 15.319444          | 559                    | 11.8                  | 11.8  | 19.3 |
| Biccari*                  | Bari                | 41.400000         | 15.202778          | 449                    | 82.6                  | 83.6  | 83.1 |
| Bisaccia *                | Bari                | 41.016667         | 15.369444          | 900                    | 78.2                  | 85.5  | 82.7 |
| Bisegna (Ente Fucino) *   | Naples              | 41.916667         | 13.652778          | 1210                   | 66.7                  | 66.7  | 93.2 |
| Bomba *                   | Pescara             | 42.034444         | 14.368333          | 424                    | 88.2                  | 88.2  | 89.6 |
| Bonefro *                 | Pescara             | 41.700000         | 14.936111          | 631                    | 94.1                  | 94.1  | 93.2 |

|                           |         |           |           |      |      |      |      |
|---------------------------|---------|-----------|-----------|------|------|------|------|
| Bosco Umbra *             | Bari    | 41.816667 | 16.002778 | 750  | 90.4 | 94.4 | 86.7 |
| Bovino *                  | Bari    | 41.250000 | 15.336111 | 646  | 85.3 | 92.6 | 85.1 |
| Brienza                   | Naples  | 40.483333 | 15.469444 | 760  | 19.6 | 19.6 | 32.1 |
| Brittoli                  | Pescara | 42.316667 | 13.852778 | 781  | 76.5 | 76.5 | 67.5 |
| Buccino                   | Naples  | 40.633333 | 15.386111 | 659  | 23.5 | 23.5 | 32.1 |
| Buonalbergo               | Naples  | 41.216667 | 14.969444 | 570  | 2.0  | 2.0  | 3.2  |
| Calitri*                  | Bari    | 40.900000 | 15.436111 | 525  | 61.5 | 65.9 | 80.0 |
| Campana *                 | Pescara | 42.250000 | 13.569444 | 570  | 85.3 | 85.3 | 86.7 |
| Campitello Matese         | Pescara | 41.483333 | 14.400222 | 1432 | 27.5 | 27.5 | 45.0 |
| Campo di Giove *          | Pescara | 42.016667 | 14.052778 | 1064 | 98.0 | 98.0 | 93.2 |
| Campo Imperatore          | Pescara | 42.450000 | 13.569444 | 2125 | 52.9 | 52.9 | 19.3 |
| Campobasso *              | Pescara | 41.560058 | 14.661959 | 686  | 98.0 | 98.0 | 93.2 |
| Campolattaro              | Naples  | 41.283333 | 14.736111 | 519  | 9.8  | 9.6  | 15.7 |
| Campolieto *              | Pescara | 41.633333 | 14.336111 | 700  | 96.1 | 96.1 | 93.2 |
| Campotosto *              | Pescara | 42.550000 | 13.369444 | 1430 | 96.1 | 96.1 | 90.0 |
| Canistro (Enel)           | Naples  | 41.950000 | 13.402778 | 500  | 2.0  | 2.0  | 0.0  |
| Cant. Ortolano            | Pescara | 42.516667 | 13.419444 | 1010 | 66.7 | 66.7 | 54.6 |
| Cant. Porcinaro           | Pescara | 42.483333 | 13.369444 | 1160 | 43.1 | 43.1 | 16.1 |
| Canterno (Enel)           | Naples  | 41.750000 | 13.252778 | 538  | 13.7 | 13.7 | 19.3 |
| Capistrello               | Naples  | 41.966667 | 13.386111 | 659  | 64.5 | 64.5 | 61.0 |
| Cappadocia *              | Naples  | 42.016667 | 13.269444 | 1157 | 80.4 | 80.4 | 67.1 |
| Capracotta *              | Pescara | 41.833333 | 14.269444 | 1400 | 92.2 | 92.2 | 83.5 |
| Caramanico                | Pescara | 42.166667 | 14.002778 | 600  | 70.3 | 70.3 | 54.2 |
| Carapelle Calvisio *      | Pescara | 42.300000 | 13.686111 | 910  | 92.2 | 92.2 | 96.4 |
| Cardito Lago Selva (Enel) | Naples  | 41.605543 | 13.971502 | 669  | 35.3 | 35.3 | 57.8 |
| Carife *                  | Naples  | 41.016667 | 15.202778 | 740  | 64.7 | 64.7 | 90.0 |
| Carovilli *               | Pescara | 41.716667 | 14.436111 | 892  | 96.1 | 96.1 | 93.2 |
| Carpineto Romano          | Naples  | 41.606754 | 13.082862 | 604  | 3.9  | 3.9  | 0.0  |
| Carpinone                 | Naples  | 41.600000 | 14.319444 | 673  | 41.2 | 41.2 | 25.3 |
| Casacalenda *             | Pescara | 41.733333 | 14.852778 | 625  | 82.4 | 82.4 | 83.5 |
| Casalbuono                | Naples  | 40.216667 | 15.686111 | 500  | 54.9 | 54.9 | 61.0 |
| Casamaina                 | Pescara | 42.266667 | 13.386111 | 1398 | 49.0 | 49.0 | 19.3 |
| Cassano Irpino            | Naples  | 40.866667 | 15.019444 | 584  | 17.6 | 17.6 | 28.9 |
| Castel del Monte *        | Pescara | 42.366667 | 13.719444 | 1300 | 92.2 | 92.2 | 96.0 |
| Castel del Monte *        | Bari    | 41.083333 | 16.269444 | 525  | 72.1 | 73.3 | 81.5 |
| Castel di Sangro *        | Pescara | 41.783333 | 14.102778 | 805  | 94.1 | 94.1 | 90.0 |
| Castel Lagopesole *       | Bari    | 40.804014 | 15.734283 | 829  | 89.2 | 91.7 | 88.0 |
| Castel S. Vincenzo        | Naples  | 41.650000 | 14.052778 | 776  | 54.9 | 54.9 | 38.6 |
| Castelcivita              | Naples  | 40.500000 | 15.236111 | 527  | 13.5 | 13.5 | 9.6  |
| Castelfranco in Miscano   | Naples  | 41.316667 | 15.086111 | 770  | 5.9  | 5.9  | 6.4  |

|                                   |         |           |           |      |       |       |      |
|-----------------------------------|---------|-----------|-----------|------|-------|-------|------|
| Castelli *                        | Pescara | 42.483333 | 13.702728 | 600  | 84.3  | 84.3  | 70.7 |
| Castelluccio di Norcia            | Rome    | 42.829000 | 13.214000 | 1453 | 82.8  | 83.3  | 81.5 |
| Castelluccio Valmaggiore          | Bari    | 41.333333 | 15.200222 | 610  | 12.0  | 11.5  | 16.5 |
| Castelmauro *                     | Pescara | 41.833333 | 14.719444 | 700  | 82.1  | 82.4  | 83.5 |
| Castelnuovo della Daunia          | Pescara | 41.583333 | 15.119444 | 543  | 78.4  | 78.4  | 70.7 |
| Castelvetere di Valfortore *      | Pescara | 41.433333 | 14.936111 | 706  | 100.0 | 100.0 | 96.4 |
| Castiglione M.M. *                | Pescara | 41.867980 | 14.448730 | 1081 | 96.1  | 96.1  | 90.0 |
| Castropignano *                   | Pescara | 41.616667 | 14.569444 | 700  | 84.3  | 84.3  | 93.2 |
| Cellole (Fasano Enel)             | Naples  | 41.203965 | 13.854955 | 545  | 0.0   | 3.9   | 0.0  |
| Centrale Anversa *                | Pescara | 42.000000 | 13.802778 | 650  | 88.2  | 88.2  | 93.2 |
| Cerchio (Ente Fucino)             | Naples  | 42.066667 | 13.602778 | 834  | 43.1  | 43.1  | 51.4 |
| Cermignano                        | Pescara | 42.590890 | 13.795758 | 543  | 9.8   | 9.8   | 16.1 |
| Chiauci *                         | Pescara | 41.683333 | 14.386111 | 879  | 100.0 | 100.0 | 96.4 |
| Chieti *                          | Pescara | 42.350000 | 14.169444 | 341  | 88.2  | 88.2  | 89.6 |
| Civita D'Antino                   | Naples  | 41.883333 | 13.469444 | 870  | 41.2  | 41.2  | 12.4 |
| Civitacampomariano *              | Pescara | 41.783333 | 14.686111 | 520  | 92.2  | 92.2  | 83.5 |
| Civitella Alfedena                | Pescara | 41.766667 | 13.936111 | 1084 | 78.4  | 78.4  | 61.0 |
| Civitella del Tronto *            | Pescara | 42.766667 | 13.669444 | 589  | 88.2  | 88.2  | 83.5 |
| Civitella Roveto (Ente Fucino)    | Naples  | 41.916667 | 13.419444 | 510  | 11.8  | 11.8  | 9.6  |
| Cocullo *                         | Pescara | 42.033333 | 13.769444 | 870  | 92.2  | 92.2  | 83.5 |
| Colle Sannita                     | Naples  | 41.366667 | 14.836111 | 719  | 37.3  | 37.3  | 16.1 |
| Collechiavica (Enel)              | Naples  | 41.581165 | 13.856312 | 730  | 2.0   | 2.0   | 3.2  |
| Colleparado-Trisulti              | Naples  | 41.766667 | 13.369444 | 820  | 79.9  | 79.9  | 73.1 |
| Collepietro *                     | Pescara | 42.216667 | 13.786111 | 885  | 98.0  | 98.0  | 96.4 |
| Colletorto *                      | Pescara | 41.666667 | 14.969444 | 515  | 94.1  | 94.1  | 90.0 |
| Colli al Volturno                 | Naples  | 41.600000 | 14.102778 | 549  | 2.0   | 2.0   | 0.0  |
| Cortino *                         | Pescara | 42.616667 | 13.502778 | 1000 | 98.0  | 98.0  | 96.4 |
| Cusano Mutri                      | Naples  | 41.333333 | 14.502778 | 512  | 17.6  | 17.6  | 16.1 |
| Ercolano (Osservatorio Vesuviano) | Naples  | 40.816667 | 14.402778 | 608  | 5.9   | 5.9   | 6.4  |
| Faeto *                           | Bari    | 41.283333 | 15.269444 | 809  | 79.4  | 80.4  | 88.4 |
| Fano a Corno *                    | Pescara | 42.483333 | 13.619444 | 670  | 88.2  | 88.2  | 96.4 |
| Fano Adriano *                    | Pescara | 42.550000 | 13.536111 | 750  | 88.2  | 88.2  | 77.1 |
| Farindola *                       | Pescara | 42.433333 | 13.819444 | 567  | 88.2  | 88.2  | 93.2 |
| Fiuggi (Fonte Vecchia)            | Naples  | 41.783333 | 13.369444 | 621  | 45.1  | 45.1  | 51.4 |
| Forca di Penne *                  | Pescara | 42.283333 | 13.836111 | 917  | 88.2  | 88.2  | 80.3 |
| Forenza *                         | Bari    | 40.858913 | 15.857422 | 836  | 61.0  | 66.7  | 82.3 |
| Forlì del Sannio                  | Naples  | 41.683333 | 14.169444 | 625  | 3.9   | 3.7   | 0.0  |
| Frattura                          | Pescara | 41.933333 | 13.869444 | 1260 | 72.5  | 72.5  | 51.4 |

|                                         |         |           |           |      |       |       |      |
|-----------------------------------------|---------|-----------|-----------|------|-------|-------|------|
| Frigento *                              | Naples  | 41.016667 | 15.102778 | 910  | 82.1  | 82.1  | 86.7 |
| Frosolone *                             | Pescara | 41.600000 | 14.452778 | 894  | 98.0  | 98.0  | 96.4 |
| Fucino Ottomila<br>(Ente Fucino)        | Naples  | 42.000000 | 13.552778 | 650  | 37.3  | 37.3  | 38.6 |
| Fucino Borgo Via Nuova (Ente<br>Fucino) | Naples  | 42.016667 | 13.452778 | 669  | 7.8   | 7.8   | 9.6  |
| Fucino Strada 28<br>(Ente Fucino)       | Naples  | 41.966667 | 13.636111 | 665  | 15.7  | 15.7  | 9.6  |
| Fucino Strada 39<br>(Ente Fucino)       | Naples  | 41.978188 | 13.504656 | 665  | 7.8   | 7.8   | 0.0  |
| Gallo (Enel)                            | Naples  | 41.464069 | 14.226661 | 840  | 21.6  | 23.5  | 38.6 |
| Gessopalena *                           | Pescara | 42.050000 | 14.269444 | 654  | 82.4  | 82.4  | 80.3 |
| Ginepri *                               | Pescara | 42.650000 | 13.586111 | 820  | 98.0  | 98.0  | 93.2 |
| Ginestra degli Schiavoni                | Naples  | 41.277925 | 15.040356 | 540  | 21.6  | 21.6  | 35.3 |
| Gioi Cilento                            | Naples  | 40.283333 | 15.219444 | 685  | 45.1  | 45.1  | 28.9 |
| Gioia Vecchia<br>(Ente Fucino) *        | Naples  | 41.900000 | 13.736111 | 1375 | 86.3  | 86.3  | 93.2 |
| Goriano Sicoli *                        | Pescara | 42.083333 | 13.786111 | 705  | 100.0 | 100.0 | 96.4 |
| Guarcino (Enel)                         | Naples  | 41.800000 | 13.286111 | 625  | 17.6  | 17.6  | 22.5 |
| Guardiagrele *                          | Pescara | 42.200000 | 14.219444 | 577  | 86.0  | 86.0  | 83.1 |
| Guardiaregia *                          | Pescara | 41.433333 | 14.536111 | 733  | 98.0  | 98.0  | 96.4 |
| Gubbio*                                 | Rome    | 43.341000 | 12.563000 | 529  | 81.6  | 81.6  | 73.5 |
| Indiprete                               | Pescara | 41.545554 | 14.339626 | 640  | 78.4  | 78.4  | 64.3 |
| Lacedonia *                             | Bari    | 41.050000 | 15.419444 | 707  | 72.3  | 76.0  | 81.1 |
| Laceno Lago                             | Naples  | 40.800000 | 15.102778 | 1170 | 11.8  | 11.8  | 19.3 |
| Lago Fucino                             | Naples  | 41.995128 | 13.547446 | 653  | 9.8   | 9.8   | 0.0  |
| Lago Matese (Brecce)                    | Naples  | 41.400000 | 14.386111 | 1050 | 38.7  | 38.7  | 41.4 |
| Lago Matese (Scennerato)                | Naples  | 41.416667 | 14.402778 | 1010 | 9.8   | 9.8   | 6.4  |
| Lama dei Peligni *                      | Pescara | 42.033333 | 14.186111 | 650  | 88.2  | 88.2  | 90.0 |
| Lanciano *                              | Pescara | 42.225833 | 14.384444 | 288  | 86.3  | 86.3  | 83.5 |
| L'Aquila *                              | Pescara | 42.350000 | 13.402778 | 735  | 92.2  | 92.2  | 86.7 |
| Leonessa *                              | Rome    | 42.578600 | 12.953600 | 974  | 86.3  | 86.3  | 77.1 |
| Letino (Bacino)                         | Naples  | 41.450000 | 13.919444 | 1187 | 64.7  | 64.7  | 57.8 |
| Liberi<br>(Contrada Merangeli)          | Naples  | 41.233333 | 14.286111 | 510  | 21.6  | 21.6  | 32.1 |
| Lioni                                   | Bari    | 40.883333 | 15.186111 | 540  | 52.2  | 53.9  | 51.4 |
| Materdomini                             | Naples  | 40.819689 | 15.236370 | 570  | 23.5  | 21.6  | 12.9 |
| Materdomini<br>(Acquedotto Pugliese)    | Naples  | 40.816667 | 15.236111 | 520  | 1.5   | 1.5   | 0.0  |
| Melfi *                                 | Bari    | 40.983890 | 15.616940 | 569  | 90.4  | 91.7  | 83.1 |
| Miranda                                 | Naples  | 41.640881 | 14.247436 | 850  | 3.9   | 2.0   | 3.2  |

|                               |         |           |           |      |      |      |      |
|-------------------------------|---------|-----------|-----------|------|------|------|------|
| Montazzoli *                  | Pescara | 41.950000 | 14.436111 | 800  | 98.0 | 98.0 | 96.4 |
| Monte S. Angelo *             | Bari    | 41.700000 | 15.952778 | 843  | 84.1 | 84.6 | 72.7 |
| Monte Terminillo *            | Rome    | 42.455600 | 12.992800 | 1750 | 83.3 | 84.1 | 86.3 |
| Montecalvo Irpino             | Naples  | 41.200000 | 15.036111 | 585  | 3.9  | 3.9  | 6.4  |
| Montefalcone di Val Fortore * | Pescara | 41.333330 | 15.019444 | 850  | 94.1 | 94.1 | 96.4 |
| Monteleone di Puglia *        | Bari    | 41.166667 | 15.252778 | 828  | 89.7 | 92.4 | 85.5 |
| Montella *                    | Naples  | 40.850000 | 15.041667 | 500  | 51.0 | 51.0 | 83.1 |
| Montemarano                   | Naples  | 40.914618 | 14.997141 | 820  | 3.9  | 3.9  | 6.4  |
| Montemitro *                  | Pescara | 41.883333 | 14.652778 | 520  | 86.3 | 86.3 | 86.3 |
| Montenero Valcocchiara *      | Pescara | 41.716667 | 14.069444 | 900  | 90.2 | 90.2 | 80.3 |
| Montenerodomo *               | Pescara | 41.983333 | 14.252778 | 1100 | 84.3 | 84.3 | 90.0 |
| Montereale *                  | Pescara | 42.483333 | 13.252778 | 948  | 89.0 | 89.0 | 93.2 |
| Montesarchio                  | Naples  | 41.033333 | 14.669444 | 560  | 13.7 | 13.5 | 18.9 |
| Montevergine Observatory *    | Naples  | 40.936569 | 14.728316 | 1280 | 87.5 | 89.5 | 99.6 |
| Monticchio Bagni              | Bari    | 40.933333 | 15.600000 | 713  | 62.7 | 67.9 | 74.7 |
| Morcone                       | Naples  | 41.350000 | 14.669444 | 640  | 9.6  | 9.6  | 6.4  |
| Muro Lucano                   | Naples  | 40.750000 | 15.486111 | 570  | 51.0 | 51.0 | 25.7 |
| Nerito *                      | Pescara | 42.550000 | 13.486111 | 800  | 98.0 | 98.0 | 93.2 |
| Nocera Umbra                  | Rome    | 43.119000 | 12.791000 | 548  | 75.0 | 76.0 | 71.1 |
| Nusco *                       | Bari    | 40.883333 | 15.086111 | 863  | 86.5 | 92.6 | 88.4 |
| Orsara di Puglia              | Bari    | 41.251110 | 15.284720 | 650  | 68.1 | 76.2 | 79.5 |
| Orto di Zolfo *               | Bari    | 41.366667 | 15.133556 | 910  | 52.2 | 55.9 | 83.9 |
| Ortona dei Marsi              | Naples  | 41.997381 | 13.728044 | 942  | 21.6 | 21.6 | 34.5 |
| Ortucchio                     | Naples  | 41.953711 | 13.644069 | 680  | 23.5 | 23.5 | 38.6 |
| Ovindoli                      | Naples  | 42.136777 | 13.515050 | 1375 | 17.2 | 17.2 | 0.0  |
| Ovindoli (Ente Fucino) *      | Naples  | 42.133333 | 13.519444 | 1370 | 68.6 | 68.6 | 93.2 |
| Pacentro *                    | Pescara | 42.050000 | 13.986111 | 650  | 80.4 | 80.4 | 67.5 |
| Padula                        | Naples  | 40.350000 | 15.652778 | 682  | 54.9 | 54.7 | 51.0 |
| Palata *                      | Pescara | 41.883333 | 14.786111 | 521  | 88.2 | 88.2 | 90.0 |
| Palena *                      | Pescara | 41.983333 | 14.136111 | 767  | 92.2 | 92.2 | 96.4 |
| Palmoli *                     | Pescara | 41.933333 | 14.586111 | 711  | 95.8 | 95.8 | 96.0 |
| Passo Capannelle              | Pescara | 42.450000 | 13.336111 | 1300 | 38.5 | 38.5 | 2.0  |
| Passo Godi                    | Pescara | 41.846591 | 13.928336 | 1542 | 15.7 | 15.7 | 25.7 |
| Passo Lanciano                | Pescara | 42.188770 | 14.105029 | 1470 | 44.9 | 44.9 | 31.7 |
| Pennapiedimonte *             | Pescara | 42.150000 | 14.202778 | 669  | 96.1 | 96.1 | 93.2 |
| Pescasseroli *                | Pescara | 41.800000 | 13.786111 | 1150 | 91.9 | 92.2 | 83.5 |
| Pescina                       | Naples  | 42.033333 | 13.652778 | 653  | 45.1 | 45.1 | 54.2 |
| Pescocostanzo *               | Pescara | 41.883333 | 14.069444 | 1395 | 90.2 | 90.2 | 80.3 |
| Pescopagano *                 | Bari    | 40.833333 | 15.402778 | 954  | 86.5 | 89.2 | 88.8 |

|                                     |         |           |           |      |       |       |      |
|-------------------------------------|---------|-----------|-----------|------|-------|-------|------|
| Pescopennataro *                    | Pescara | 41.883333 | 14.302778 | 1190 | 96.1  | 96.1  | 93.2 |
| Pescosansonesco *                   | Pescara | 42.254126 | 13.884449 | 540  | 96.1  | 96.1  | 93.2 |
| Petrella Liri (Ente Fucino)         | Naples  | 42.016667 | 13.286111 | 1065 | 23.5  | 23.5  | 19.3 |
| Pettorano (C.Le Gizio)              | Pescara | 41.966667 | 13.969444 | 520  | 78.4  | 78.4  | 64.3 |
| Piaggine                            | Naples  | 40.350000 | 15.386111 | 710  | 25.5  | 25.5  | 18.9 |
| Picerno                             | Naples  | 40.633333 | 15.602778 | 728  | 49.3  | 49.3  | 35.3 |
| Picinisco                           | Naples  | 41.650000 | 13.869444 | 725  | 9.8   | 9.8   | 16.1 |
| Picinisco - Grotta Campanaro (Enel) | Naples  | 41.666667 | 13.902778 | 785  | 41.2  | 41.2  | 57.8 |
| Piedimonte D'Alife (Oss. M. Muto)   | Naples  | 41.350000 | 14.336111 | 579  | 9.8   | 9.8   | 0.0  |
| Piedimonte Matese (Monte Muto)      | Naples  | 41.333333 | 14.502778 | 545  | 3.9   | 3.9   | 6.4  |
| Piedipaterno                        | Rome    | 42.766667 | 12.869444 | 333  | 64.7  | 64.7  | 50.6 |
| Pietrabbondante                     | Pescara | 41.750000 | 14.386111 | 1027 | 78.4  | 78.4  | 73.9 |
| Pietracamela *                      | Pescara | 42.516667 | 13.552778 | 1000 | 97.8  | 98.0  | 96.4 |
| Pietralunga *                       | Rome    | 43.433333 | 12.436111 | 607  | 87.0  | 87.3  | 87.1 |
| Pizzoferrato *                      | Pescara | 41.916667 | 14.236111 | 1251 | 100.0 | 100.0 | 93.2 |
| Poggio Picenze *                    | Pescara | 42.316667 | 13.552778 | 830  | 94.1  | 94.1  | 86.7 |
| Pretoro *                           | Pescara | 42.216667 | 14.136111 | 550  | 92.2  | 92.2  | 93.2 |
| Riccìa *                            | Pescara | 41.483333 | 14.836111 | 700  | 90.2  | 90.2  | 90.0 |
| Ripabottoni                         | Pescara | 41.683333 | 14.802778 | 650  | 78.4  | 78.4  | 61.0 |
| Ripacandida *                       | Bari    | 40.900830 | 15.733330 | 620  | 88.0  | 90.4  | 82.3 |
| Rocca di Mezzo *                    | Pescara | 42.200000 | 13.519444 | 1329 | 94.1  | 94.1  | 90.0 |
| Rocca Pia                           | Pescara | 41.933333 | 13.986111 | 1184 | 76.5  | 76.5  | 57.8 |
| Rocca S. Maria Fr. Imposta          | Pescara | 42.686402 | 13.527177 | 1085 | 11.8  | 11.8  | 19.3 |
| Roccacaramanico                     | Pescara | 42.100000 | 14.019444 | 1050 | 25.5  | 25.5  | 0.0  |
| Roccacasale *                       | Pescara | 42.122263 | 13.887687 | 500  | 96.1  | 96.1  | 93.2 |
| Roccagloriosa                       | Naples  | 40.100000 | 15.436111 | 501  | 11.8  | 11.8  | 6.4  |
| Roccamandolfi *                     | Pescara | 41.500000 | 14.352778 | 810  | 100.0 | 100.0 | 96.4 |
| Roccamonfina                        | Naples  | 41.283333 | 13.986111 | 815  | 31.4  | 31.4  | 16.1 |
| Roccamorice                         | Pescara | 42.211941 | 14.025482 | 520  | 68.6  | 68.6  | 64.3 |
| Roccaraso *                         | Pescara | 41.833333 | 14.069444 | 1245 | 76.5  | 76.5  | 86.7 |
| Roccasicura *                       | Naples  | 41.700000 | 14.236111 | 722  | 88.2  | 86.3  | 89.6 |
| Rocchetta a Volturno                | Naples  | 41.622739 | 14.087783 | 548  | 7.8   | 7.8   | 12.9 |
| Rocchetta S. Antonio                | Bari    | 41.100000 | 15.452778 | 679  | 64.5  | 71.1  | 79.1 |
| Rosello *                           | Pescara | 41.900000 | 14.352778 | 890  | 88.2  | 88.2  | 93.2 |
| Roseto Valfortore *                 | Pescara | 41.366667 | 15.102778 | 650  | 98.0  | 98.0  | 96.4 |
| S. Agata di Puglia                  | Bari    | 41.150000 | 15.386111 | 791  | 71.8  | 76.5  | 73.5 |

|                                      |         |           |           |      |      |      |      |
|--------------------------------------|---------|-----------|-----------|------|------|------|------|
| S. Angelo a Fasanella                | Naples  | 40.450000 | 15.352778 | 557  | 39.2 | 39.2 | 19.3 |
| S. Angelo D'Alife                    | Naples  | 41.366667 | 14.269444 | 780  | 2.0  | 2.0  | 0.0  |
| S. Angelo dei Lombardi *             | Bari    | 40.933333 | 15.169444 | 870  | 88.0 | 91.9 | 83.9 |
| S. Angelo Limosano                   | Pescara | 41.700000 | 14.602778 | 899  | 64.7 | 64.7 | 51.4 |
| S. Bartolomeo in Galdo               | Pescara | 41.416667 | 15.019444 | 554  | 76.5 | 76.5 | 77.1 |
| S. Benedetto dei Marsi (Ente Fucino) | Naples  | 42.016667 | 13.619444 | 670  | 39.2 | 39.2 | 44.2 |
| S. Biagio Saracinesco *              | Naples  | 41.600000 | 13.936111 | 850  | 80.4 | 80.4 | 79.9 |
| S. Biagio Saracinesco (Selva) Enel   | Naples  | 41.613426 | 13.927501 | 800  | 3.9  | 3.9  | 0.0  |
| S. Croce del Sannio                  | Naples  | 41.366667 | 14.736111 | 724  | 44.6 | 44.6 | 18.5 |
| S. Donato Val di Comino              | Naples  | 41.706856 | 13.812443 | 800  | 17.6 | 17.6 | 0.0  |
| S. Elia a Pianisi *                  | Pescara | 41.616667 | 14.869444 | 650  | 94.1 | 94.1 | 86.7 |
| S. Eufemia a Maiella *               | Pescara | 42.116667 | 14.019444 | 870  | 70.6 | 70.6 | 93.2 |
| S. Giorgio la Molarata               | Naples  | 41.266667 | 14.919444 | 580  | 3.9  | 3.9  | 0.0  |
| S. Giovanni a Piro                   | Naples  | 40.050000 | 15.452778 | 585  | 15.7 | 15.7 | 19.3 |
| S. Giovanni Rotondo *                | Bari    | 41.700000 | 15.736111 | 557  | 75.5 | 77.2 | 83.1 |
| S. Gregorio Matese (Enel)            | Naples  | 41.383333 | 14.369444 | 535  | 7.8  | 7.8  | 6.4  |
| S. Iona (Ente Fucino)                | Naples  | 42.099133 | 13.510097 | 950  | 2.0  | 2.0  | 0.0  |
| S. Marco In Lamis *                  | Bari    | 41.716667 | 15.636111 | 560  | 89.2 | 90.9 | 83.5 |
| S. Mauro Cilento                     | Naples  | 40.225675 | 15.044967 | 530  | 2.0  | 2.0  | 3.2  |
| S. Pelino                            | Pescara | 42.052530 | 13.461754 | 751  | 31.4 | 31.4 | 25.7 |
| S. Pietro Avellana (Feudozzo)        | Naples  | 41.774046 | 14.381815 | 927  | 31.4 | 31.4 | 51.4 |
| S. Rufo                              | Naples  | 40.416667 | 15.469444 | 620  | 21.6 | 21.6 | 16.1 |
| S. Stefano Di Sessanio               | Pescara | 42.350000 | 13.636111 | 1221 | 76.5 | 76.5 | 57.8 |
| Sala Consilina                       | Naples  | 40.383330 | 15.602778 | 580  | 27.5 | 27.5 | 16.1 |
| San Fele *                           | Bari    | 40.816667 | 15.536111 | 862  | 90.2 | 91.2 | 80.7 |
| San Vito Romano                      | Naples  | 41.883333 | 12.986111 | 605  | 66.7 | 66.7 | 63.9 |
| Sansumino                            | Naples  | 40.200227 | 15.276225 | 518  | 2.0  | 2.0  | 0.0  |
| Santa Fiora                          | Rome    | 42.833333 | 11.586111 | 687  | 75.7 | 76.0 | 63.9 |
| Santeramo In Colle                   | Bari    | 40.800000 | 16.752778 | 503  | 63.5 | 65.4 | 71.5 |
| Savignano Di Puglia                  | Bari    | 41.233333 | 16.186111 | 718  | 51.0 | 53.7 | 36.9 |
| Savignano Irpino                     | Bari    | 41.216940 | 15.183330 | 726  | 20.8 | 22.5 | 39.4 |
| Scanno *                             | Pescara | 41.900000 | 13.886111 | 1030 | 86.3 | 88.2 | 90.0 |
| Scoppito *                           | Pescara | 42.366667 | 13.252778 | 800  | 96.1 | 96.1 | 90.0 |
| Segni                                | Naples  | 41.690138 | 13.020036 | 666  | 58.8 | 58.8 | 51.4 |
| Senerchia                            | Naples  | 40.733333 | 15.202778 | 600  | 2.0  | 2.0  | 3.2  |
| Sepino                               | Naples  | 41.400000 | 14.619444 | 716  | 70.6 | 70.6 | 64.3 |

|                                       |         |           |           |      |      |      |      |
|---------------------------------------|---------|-----------|-----------|------|------|------|------|
| Settefrati<br>(Mad. Del Canneto) Enel | Naples  | 41.683333 | 13.902778 | 764  | 5.9  | 5.9  | 9.6  |
| Settefrati (Paese)                    | Naples  | 41.666667 | 13.852778 | 784  | 27.5 | 27.5 | 45.0 |
| Sorgenti Scirca *                     | Rome    | 43.350000 | 12.719444 | 750  | 90.2 | 90.2 | 86.7 |
| Spinete *                             | Pescara | 41.550000 | 14.486111 | 590  | 94.1 | 94.1 | 90.0 |
| Sulmona *                             | Pescara | 42.050000 | 13.919444 | 420  | 90.0 | 90.2 | 92.8 |
| Teora                                 | Bari    | 40.850000 | 15.252778 | 762  | 60.5 | 70.3 | 77.5 |
| Termine *                             | Pescara | 42.433333 | 13.202778 | 1050 | 96.1 | 96.1 | 93.2 |
| Torella Dei Lombardi                  | Naples  | 40.933333 | 15.119444 | 615  | 64.7 | 64.5 | 60.6 |
| Tornimparte *                         | Pescara | 42.283333 | 13.302778 | 886  | 90.0 | 90.2 | 93.2 |
| Toro *                                | Pescara | 41.566667 | 14.769444 | 540  | 82.4 | 82.4 | 83.5 |
| Torrebruna *                          | Pescara | 41.866667 | 14.536111 | 857  | 90.2 | 90.2 | 96.4 |
| Tramonti (Chiunzi)                    | Naples  | 40.716667 | 14.619444 | 675  | 29.4 | 29.4 | 41.8 |
| Treponti                              | Pescara | 42.475005 | 13.286111 | 764  | 17.6 | 17.6 | 0.0  |
| Trivento                              | Pescara | 41.783333 | 14.552778 | 550  | 78.2 | 78.2 | 73.5 |
| Vallata                               | Naples  | 41.033333 | 15.252778 | 870  | 19.6 | 19.6 | 12.9 |
| Valleluce<br>(Collechiavica) Enel     | Naples  | 41.583333 | 13.852778 | 680  | 33.3 | 33.3 | 48.2 |
| Vallo Della Luc. (Cann.)              | Naples  | 40.243917 | 15.293364 | 521  | 19.6 | 19.6 | 32.1 |
| Vastogirardi *                        | Pescara | 41.766667 | 14.252778 | 1137 | 88.2 | 88.2 | 86.7 |
| Villa S. Lucia *                      | Pescara | 42.333333 | 13.769444 | 850  | 96.1 | 96.1 | 93.2 |
| Villa Vallucci *                      | Pescara | 42.600000 | 13.602778 | 500  | 84.3 | 84.3 | 86.7 |
| Villalago                             | Pescara | 41.930000 | 13.830000 | 935  | 23.5 | 23.5 | 38.6 |
| Villavallelonga                       | Naples  | 41.871437 | 13.620439 | 1005 | 31.4 | 31.4 | 6.4  |
| Villavallelonga *<br>(Ente Fucino)    | Naples  | 41.866667 | 13.619444 | 1005 | 64.7 | 64.7 | 86.7 |
| Vinchiaturò *                         | Pescara | 41.483333 | 14.586111 | 624  | 90.2 | 90.2 | 93.2 |
| Volturara Appula *                    | Pescara | 41.500000 | 15.052778 | 668  | 88.2 | 88.2 | 83.5 |
| Volturino                             | Bari    | 41.483333 | 15.116889 | 735  | 33.3 | 42.6 | 68.7 |

**Table 2.** List of break points identified in the investigated SCD and NDS time series by Climatol toolbox. For each inhomogeneous station, the date (mm/yyyy) when break point occurred and the detected Standard Normal Homogeneity Test (SNHT) value are shown.

| <b>Station name</b> | <b>Date (mm/yyyy)</b> | <b>Parameter</b> | <b>SNHT value</b> |
|---------------------|-----------------------|------------------|-------------------|
| Cappadocia          | 12/1980               | SCD              | 47.9              |
| Gioia Vecchia       | 11/1998               | SCD              | 31.4              |
| Pescopagano         | 04/1957               | SCD              | 45.3              |
| Bosco Umbra         | 04/1963               | SCD              | 59.9              |
| Pizzoferrato        | 04/1966               | SCD              | 71.4              |
| Roccamandolfi       | 04/1973               | SCD              | 41.1              |
| Spinete             | 12/1977               | SCD              | 46.8              |
| Capracotta          | 05/1983               | NDS              | 45.7              |
| Pizzoferrato        | 04/1966               | NDS              | 77.8              |
